# Supplementary material for: Multisite medical record review of emergency department visits for traumatic brain injury
Source: PubMed Central journal article supplement — Inj Prev. 2021 Mar 4;27(Suppl 1):i42–8. doi: 10.1136/injuryprev-2019-043510 (PMC7948178; doi:10.1136/injuryprev-2019-043510), 2021-03-04
Supplement: injuryprev-2019-043510supp001.pdf [file injuryprev-2019-043510supp001.pdf]

## Categorization of imaging\* findings from radiology reports

## Multi-site review of ICD-10-CM codes for intracranial injury and skull fracture treated in emergency departments

| <b>Fracture of the following bones</b>                                                                                                                                                                                                                                                                                                                                                                                                                                                                                                                                                                                                                                                                                                                                                                                    |                                                                                                                                                               |                                                                                                                                                                                                                                                                                                                                                                                                                                                                                                  |
|---------------------------------------------------------------------------------------------------------------------------------------------------------------------------------------------------------------------------------------------------------------------------------------------------------------------------------------------------------------------------------------------------------------------------------------------------------------------------------------------------------------------------------------------------------------------------------------------------------------------------------------------------------------------------------------------------------------------------------------------------------------------------------------------------------------------------|---------------------------------------------------------------------------------------------------------------------------------------------------------------|--------------------------------------------------------------------------------------------------------------------------------------------------------------------------------------------------------------------------------------------------------------------------------------------------------------------------------------------------------------------------------------------------------------------------------------------------------------------------------------------------|
| <b>Positive for Traumatic Brain Injury (TBI)<br/>including non-displaced or probable fracture</b>                                                                                                                                                                                                                                                                                                                                                                                                                                                                                                                                                                                                                                                                                                                         | <b>Suspected TBI</b>                                                                                                                                          | <b>Not TBI</b>                                                                                                                                                                                                                                                                                                                                                                                                                                                                                   |
| Calvarium ( <i>combination of a portion of the frontal, occipital and parietal bones</i> )<br>Ethmoid sinus, ethmoid air cell ( <i>any wall - anterior, superior, posterior, inferior or lateral</i> )<br>Fossa ( <i>anterior, middle or posterior</i> )<br>Frontal bone<br>Frontal sinus<br>Lamina papyracea ( <i>right, left or ethmoid</i> )<br>Posterior wall of the maxillary sinus<br>Occipital condyle, occipital bone, occipital calvarium<br>Orbital roof, superior orbit<br>Orbital wall ( <i>medial, lateral, right or left; but NOT orbital rim</i> )<br>Orbital fracture, orbital blowout fracture ( <i>not further specified</i> )<br>Parietal bone<br>Quadripod, quadramalar fracture<br>Skull ( <i>not further specified</i> )<br>Sphenoid bone<br>Temporal bones<br>Zygomaticomaxillary complex fracture | Any of the bones in the positive category with documentation of "suspected," "questionable" or "possible" fracture or a fracture of the inferior orbital wall | Le Fort fracture (I, II or III)<br>Mandible, mandibular condyle<br>Mastoid air cells, tegmen mastoideum ( <i>roof of mastoid air cells</i> )<br>Maxilla, maxillary bone<br>Maxillary sinus wall ( <i>any wall except posterior, i.e. anterior, superior, inferior or lateral</i> )<br>Nasal bone, nasal septum<br>Orbital floor<br>Orbital rim ( <i>inferior, infra-, lateral; orbital rim is NOT the same as orbital wall</i> )<br>Pterygoid plate<br>Septal fracture<br>Zygoma, zygomatic arch |
| <b>Hemorrhage/bleeding in the following areas</b>                                                                                                                                                                                                                                                                                                                                                                                                                                                                                                                                                                                                                                                                                                                                                                         |                                                                                                                                                               |                                                                                                                                                                                                                                                                                                                                                                                                                                                                                                  |
| <b>Positive for Traumatic Brain Injury (TBI)</b>                                                                                                                                                                                                                                                                                                                                                                                                                                                                                                                                                                                                                                                                                                                                                                          | <b>Suspected TBI</b>                                                                                                                                          | <b>Not TBI</b>                                                                                                                                                                                                                                                                                                                                                                                                                                                                                   |
| Hemorrhage in antrum<br>Hemorrhage in ethmoid sinus/ air cell<br>Epidural hemorrhage<br>Intracerebral hemorrhage<br>Intracranial hemorrhage<br>Intraventricular hemorrhage<br>Parenchymal hemorrhage<br>Subarachnoid hemorrhage<br>Subdural hemorrhage                                                                                                                                                                                                                                                                                                                                                                                                                                                                                                                                                                    |                                                                                                                                                               | Cephalohematoma over right lateral convexity<br>Bleeding in frontal sinus<br>Bleeding in intra or extraconal regions<br>Intraorbital hemorrhage<br>Bleeding in mastoid air cells or mastoid cavity<br>Bleeding in maxillary sinus or maxillary antrum                                                                                                                                                                                                                                            |
| <b>Other findings in the radiology report</b>                                                                                                                                                                                                                                                                                                                                                                                                                                                                                                                                                                                                                                                                                                                                                                             |                                                                                                                                                               |                                                                                                                                                                                                                                                                                                                                                                                                                                                                                                  |
| <b>Positive for Traumatic Brain Injury (TBI)</b>                                                                                                                                                                                                                                                                                                                                                                                                                                                                                                                                                                                                                                                                                                                                                                          | <b>Suspected TBI</b>                                                                                                                                          | <b>Not TBI</b>                                                                                                                                                                                                                                                                                                                                                                                                                                                                                   |
| Edema of frontal lobe or other part of the brain<br>Extra-axial fluid<br>Fluid in ethmoid sinus/air cell<br>Intracranial air/pneumocephalus<br>Orbital herniation into ethmoid sinus/air cell<br>Traumatic brain injury                                                                                                                                                                                                                                                                                                                                                                                                                                                                                                                                                                                                   |                                                                                                                                                               | Cerebral atrophy, volume loss<br>"Chronic" or "old" injuries<br>Extraconal gas<br>Facial gas<br>Fluid in mastoid air cells or mastoid cavity<br>Injury of nasolacrimal duct<br>Neoplasms, cancers<br>Herniation of orbital or extraconal fat<br>Air in orbital soft tissue<br>Proptosis<br>Subcutaneous emphysema                                                                                                                                                                                |

\*Imaging with or without contrast
